# Supplementary material for: 2D Layer Structure in Two New Cu(II) Crystals: Structural Evolvement and Properties
Source: MDPI journal article supplement (doi:10.3390/cryst12050585), 2022-04-22
Supplement: s1 [file s1]

# Supporting Information

## 2D Layer Structure in Two New Cu(II) Crystals: Structural Evolvment and Properties

Jia-Jing Luo<sup>1</sup>, Xiang-Xin Cao<sup>1</sup>, Qi-Wei Chen<sup>1</sup>, Ying Qin<sup>1</sup>, Zhen-Wei Zhang<sup>1,\*</sup>, Lian-Qiang Wei<sup>2,\*</sup>, Qing Chen<sup>1</sup>

<sup>1</sup> College of Pharmacy, Guangxi Zhuang Yao Medicine Center of Engineering and Technology, Guangxi University of Chinese Medicine, Nanning, 530200, P. R. China.; charliezh@163.com (Z.-W.Z.)

<sup>2</sup> College of Chemistry and Bio-engineering, Hechi University, Yizhou, 546300, P. R. China.; wlq259@163.com (L.-Q. W.)

\* Correspondence: charliezh@163.com (Z.-W. Z.); wlq259@163.com (L.-Q. W.)

**Table S1.** Hydrogen-bonding parameters in **1**.

| D–H···A                  | d(D···H)/Å | d(H···A)/Å | d(D···A)/Å | D–H···A /° | Symmetry code                      |
|--------------------------|------------|------------|------------|------------|------------------------------------|
| O5–H5A···O1 <sup>1</sup> | 0.85       | 1.92       | 2.757(2)   | 166.7      | <sup>1</sup> -1/2+X, 3/2-Y, -1/2+Z |
| O5–H5B···O4 <sup>2</sup> | 0.85       | 2.07       | 2.880(2)   | 160.1      | <sup>2</sup> 5/2-X, 1/2+Y, -1/2-Z  |

**Table S2.** Hydrogen-bonding parameters in **2**.

| D–H···A                 | d(D···H)/Å | d(H···A)/Å | d(D···A)/Å | D–H···A /° | Symmetry code           |
|-------------------------|------------|------------|------------|------------|-------------------------|
| O1–H1···O4 <sup>1</sup> | 0.82       | 1.78       | 2.5770(16) | 165.4      | <sup>1</sup> -1+X,+Y,+Z |

**Table S3.** Selected bond lengths (Å) and angles (°) for **1**.

|                        |            |                         |            |
|------------------------|------------|-------------------------|------------|
| Cu1-N1                 | 2.0288(15) | N2-C10                  | 1.337(2)   |
| Cu1-N3                 | 2.0452(15) | C11-N3                  | 1.354(2)   |
| Cu1-O4 <sup>1</sup>    | 2.0950(13) | N3-C15                  | 1.334(2)   |
| Cu1-O2 <sup>2</sup>    | 1.9399(12) | C23-O4                  | 1.267(2)   |
| N1-C5                  | 1.353(2)   | C23-O3                  | 1.236(2)   |
| N1-C1                  | 1.333(2)   | C22-O2                  | 1.273(2)   |
| N1-Cu1-N3              | 157.18(6)  | O22-Cu1-N1              | 99.69(6)   |
| N1-Cu1-O4 <sup>1</sup> | 97.16(6)   | O22-Cu1-N3              | 94.26(6)   |
| N3-Cu1-O4 <sup>1</sup> | 98.64(6)   | O22-Cu1-N2              | 146.54(6)  |
| N2-Cu1-N1              | 79.43(6)   | O22-Cu1-O4 <sup>1</sup> | 98.17(6)   |
| N2-Cu1-N3              | 78.98(6)   | C5-N1-Cu1               | 114.83(12) |
| N2-Cu1-O4 <sup>1</sup> | 115.20(6)  | C1-N1-Cu1               | 125.76(13) |

<sup>1</sup>-1/2+X, 3/2-Y, 1/2+Z; <sup>2</sup>-1+X, +Y, +Z

**Table S4.** Selected bond lengths (Å) and angles (°) for **2**.

|                        |            |            |            |
|------------------------|------------|------------|------------|
| Cu1-O3 <sup>1</sup>    | 2.2431(13) | O2-C22     | 1.218(2)   |
| Cu1-O5                 | 1.9102(11) | O5-C27     | 1.275(2)   |
| Cu1-N2                 | 1.9330(13) | N2-C10     | 1.335(2)   |
| Cu1-N3                 | 2.0217(14) | N2-C6      | 1.340(2)   |
| Cu1-N1                 | 2.0200(14) | N3-C11     | 1.355(2)   |
| O3-C23                 | 1.266(2)   | N3-C15     | 1.337(2)   |
| O5-Cu1-O3 <sup>1</sup> | 91.43(5)   | C1-N1-C5   | 119.32(15) |
| O5-Cu1-N2              | 168.28(6)  | N2-C10-C9  | 120.49(14) |
| O5-Cu1-N3              | 98.81(5)   | N1-C5-C6   | 113.64(14) |
| O5-Cu1-N1              | 99.87(5)   | N1-C5-C4   | 121.60(15) |
| N2-Cu1-O3 <sup>1</sup> | 100.26(5)  | N3-C11-C10 | 113.41(14) |
| N2-Cu1-N3              | 79.90(5)   | N3-C11-C12 | 121.55(14) |

<sup>1</sup>+X, 1 +Y, +Z
